# Supplementary material for: Androgen Receptor (AR)-TLR4 Crosstalk Mediates Gender Disparities in Hepatocellular Carcinoma Incidence and Progression
Source: PubMed Central journal article supplement (PMC6959060; doi:10.7150/jca.30682), 2020-01-01
Supplement: jcav11p1094s1.pdf [file jcav11p1094s1.pdf]

## Figure S1 Schematic diagram for the procedure of the mouse HCC model and assay

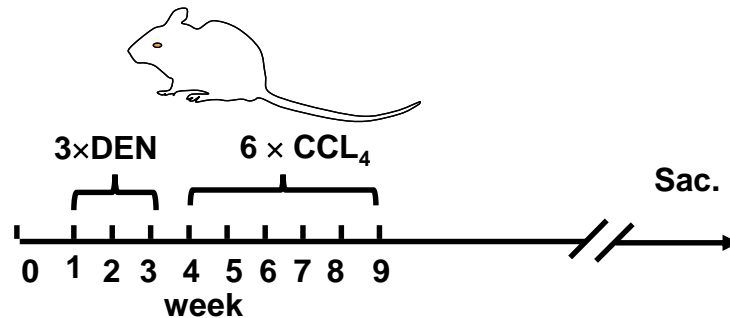

**Figure S1. Schematic diagram for the procedure of the mouse HCC model and assay.** C57BL/6 mice were injected three times with DEN (100 mg/kg, i.p.) at the age of 2 weeks followed by six injections of CCl<sub>4</sub> (0.5 ml/kg i.p.) and sacrificed at different time points after DEN treatment.

**Figure S2. AR and ER expression levels in human HCC cell lines**

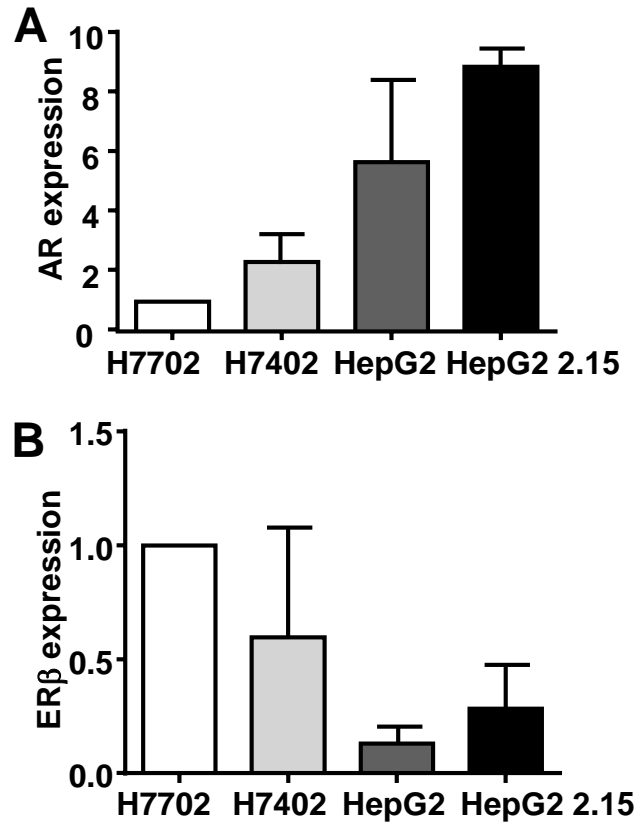

**Figure S2. AR and ER are constitutively expressed in human HCC cell lines.**

The mRNA levels of AR (A) and ERβ (B) were detected in the indicated cell lines.

Data are represented as mean  $\pm$  SEM.
